# Supplementary material for: Maternal blood contamination of collected cord blood can be identified using DNA methylation at three CpGs
Source: PubMed Central journal article supplement (PMC5526324; doi:10.1186/s13148-017-0370-2), 2017-07-25

## Tables

Table 1: Primer sequences used for pyrosequencing

| <b>Primer name</b>        | <b>Sequence</b>                     |
|---------------------------|-------------------------------------|
| <b>cg25556035 F</b>       | AGTTTTTGTTTTTTAGGGTAGGTATTGATA      |
| <b>cg25556035 R-biot</b>  | AACTCCAACACAAACTATTTACAC            |
| <b>cg25556035 Seq</b>     | GTTTTTTTTTTTTTTTTAGTATTAATTAATTTAAG |
| <b>cg15931839 F</b>       | TAGATTTTATTTTAAAGTTAGGGTGTGTGG      |
| <b>cg15931839 R-biot</b>  | AACCAAACCATATTTAAAACCTTATTC         |
| <b>cg15931839 Seq</b>     | GAATAGAAAAAAATTAGTTAGGAG            |
| <b>cg002812891 F-biot</b> | ATGGTGTAGTAGGTGAGTTTGT              |
| <b>cg002812891 R</b>      | TACAACCCACCTCTACTCCATCCTAAC         |
| <b>cg002812891 Seq</b>    | AACTACCACCCCATACCATCCC              |

Table 2: Beta value thresholds used for DNA methylation arrays and pyrosequencing

|                   | <b>Array-SWAN</b> | <b>Array-BMIQ</b> | <b>Pyrosequencing</b> |
|-------------------|-------------------|-------------------|-----------------------|
| <b>cg25556035</b> | 0.123726          | 0.085192          | 0.057375              |
| <b>cg13138089</b> | 0.18849           | 0.214598          |                       |
| <b>cg12634306</b> | 0.128539          | 0.140893          |                       |
| <b>cg25241559</b> | 0.209688          | 0.230536          |                       |
| <b>cg02812891</b> | 0.107235          | 0.102181          | 0.029425              |
| <b>cg15645660</b> | 0.267049          | 0.279702          |                       |
| <b>cg19509778</b> | 0.117568          | 0.062266          |                       |
| <b>cg15931839</b> | 0.14165           | 0.084144          | 0.081525              |
| <b>cg16617301</b> | 0.159146          | 0.106105          |                       |
| <b>cg24767131</b> | 0.145945          | 0.185700          |                       |



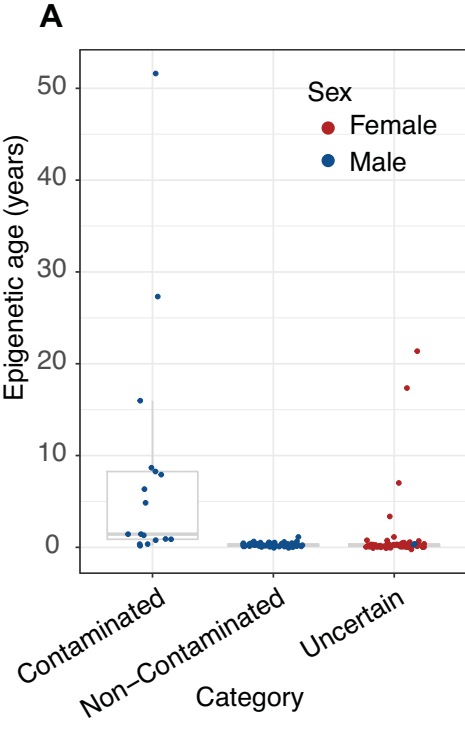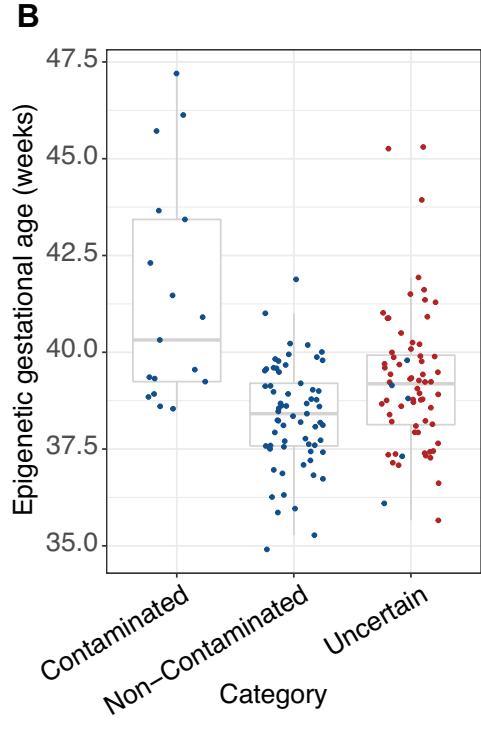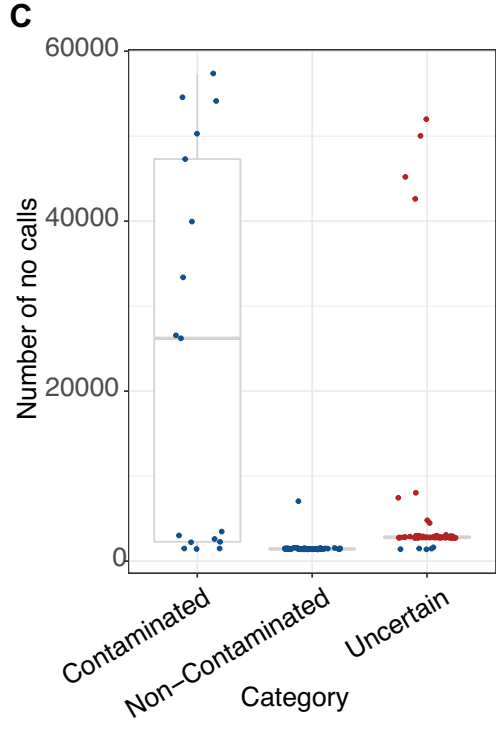

Array Residuals First Cohort

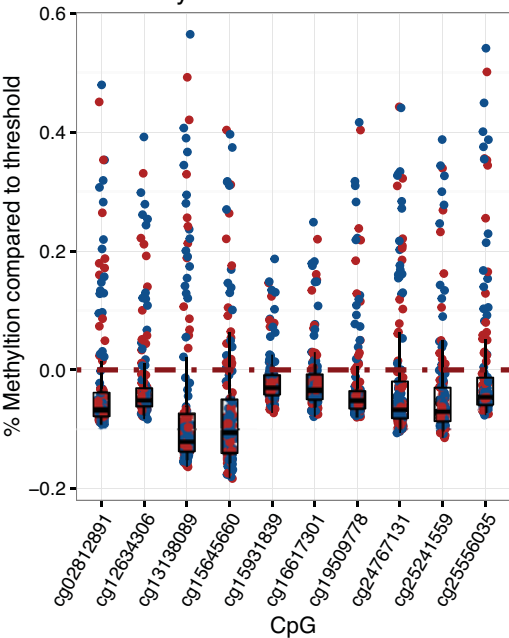

Sex  
 Female  
 Male

Array Residuals Second Cohort

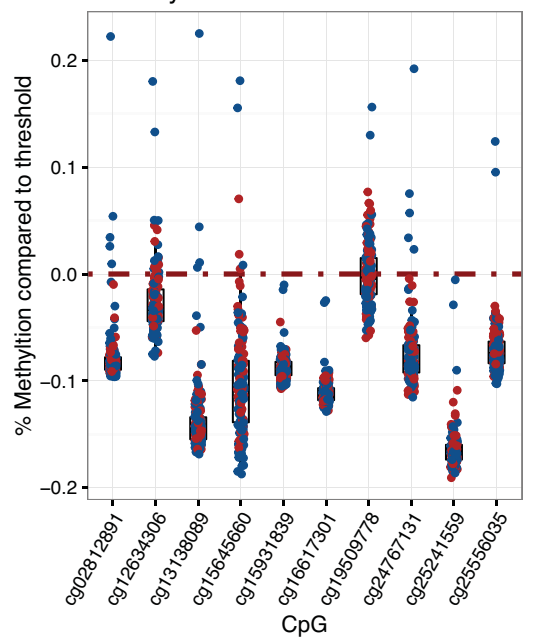

Array residuals GEO Datasets

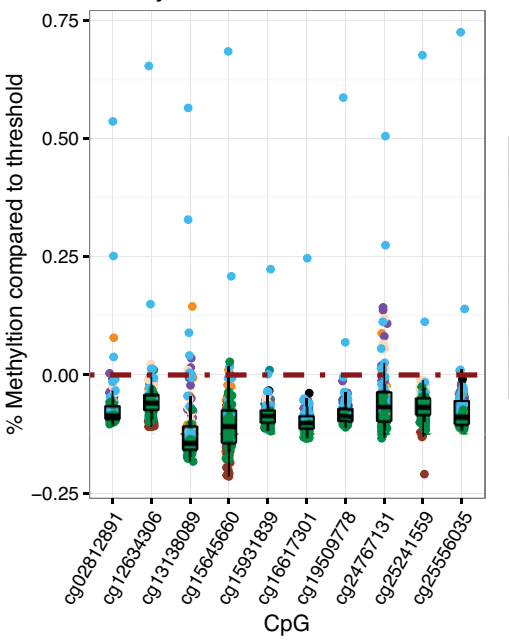

Array residuals Predo

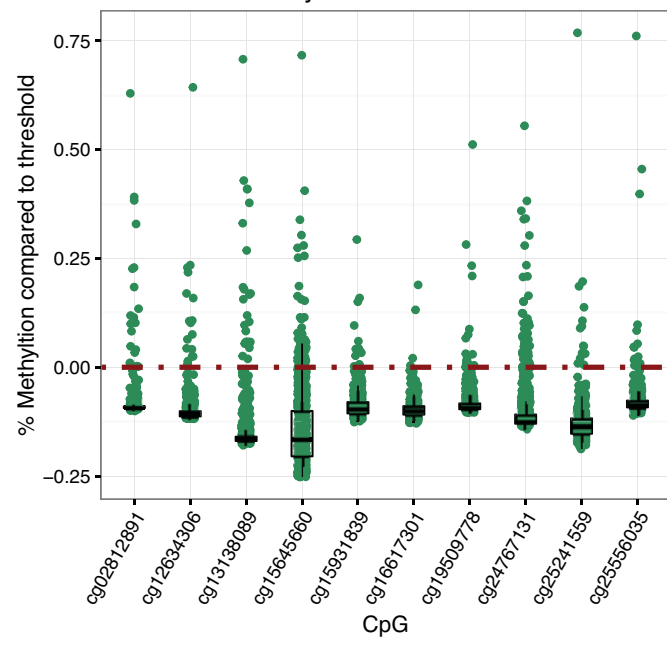

Supplement: 13148_2017_370_MOESM1_ESM.pdf [file 13148_2017_370_MOESM1_ESM.pdf]
